# Supplementary material for: A novel one-dimensional Y2(Zr0.6Ti0.4)2O7:Eu tube-in-tube nanostructure fabricated by a single-nozzle electrospinning technique and its low color drift property at high temperature
Source: Royal Society of Chemistry journal article supplement (doi:10.1039/d4ce00149d), 2024-01-01
Supplement: d4ce00149d1.pdf [file d4ce00149d1.pdf]

# Supporting Information

## **A novel one-dimensional $Y_2(\text{Zr}_{0.6}\text{Ti}_{0.4})_2\text{O}_7:\text{Eu}$ tube-in-tube nanostructure fabricated by a single-nozzle electrospinning technique and its low color drift property at high temperature**

Shanshan Cong<sup>1</sup>, Zhuang Tian<sup>1</sup>, Hongquan Yu<sup>1,\*</sup>, Sai Xu<sup>1</sup>, Lihong Cheng<sup>1,\*</sup>, Baojiu Chen<sup>1,\*</sup>, Tianshuo Liu<sup>2</sup>

<sup>1</sup>Department of Physics, Dalian Maritime University, Dalian 116026, Liaoning, China

<sup>2</sup>Department of Physics and Astronomy, University College London, Gower St., London WC1E 6BT, United Kingdom

\*Corresponding authors: **Hongquan Yu, Lihong Cheng and Baojiu Chen**

Address: No. 1, Linghai Road, Dalian 116026, Liaoning, P. R. China

E-mail: yuhq7808@126.com (H. Yu); bjchen@dlnu.edu.cn (B. Chen)

Tel/Fax: +86-411-84728909

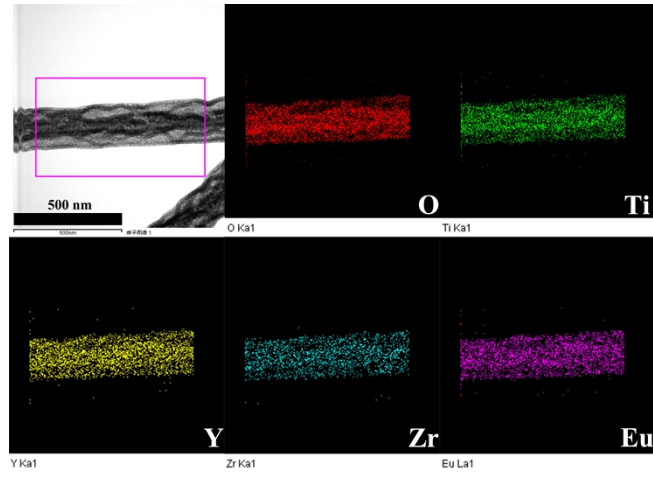

Fig. S1 EDS mapping images of  $Y_2(Zr_{0.6}Ti_{0.4})_2O_7:30\%Eu$  tube-in-tube nanostructures.

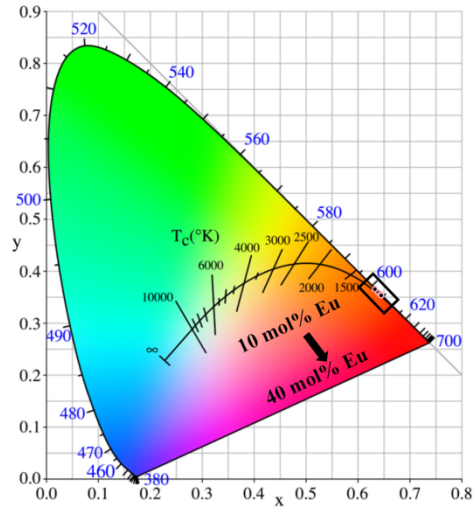

Fig. S2 Color coordinates of  $Y_2(Zr_{0.6}Ti_{0.4})_2O_7:x \text{ mol\% Eu}^{3+}$  ( $x = 10, 20, 30, 40$ ) tube-in-tube nanostructures.

| (a) Formula    | $Y_2$<br>$(Ti_{0.6}Zr_{0.4})_2:30\%Eu^{3+}$ | (b) Formula    | $Y_2$<br>$(Ti_{0.6}Zr_{0.4})_2:40\%Eu^{3+}$ |
|----------------|---------------------------------------------|----------------|---------------------------------------------|
| Spacegroup     | Fd-3m                                       | Spacegroup     | Fd-3m                                       |
| Cellparameters | a=10.28774 A                                | Cellparameters | a=10.294447A                                |
|                | b=10.28774 A                                |                | b=10.294447 A                               |
|                | c=10.28774 A                                |                | c=10.294447A                                |
|                | $\alpha=\gamma=\beta=90^\circ$              |                | $\alpha=\gamma=\beta=90^\circ$              |
| Cell volume    | 1088.829A                                   | Cell volume    | 1090.961A                                   |
| Rwp            | 3.07%                                       | Rwp            | 3.07%                                       |
| Rp             | 2.48%                                       | Rp             | 2.46%                                       |
| X <sup>2</sup> | 1.693                                       | X <sup>2</sup> | 1.552                                       |

**Table S1** Crystallographic and structural refinement data of  $Y_2(Zr_{0.6}Ti_{0.4})_2O_7:30\%Eu$  and  $Y_2(Zr_{0.6}Ti_{0.4})_2O_7:40\%Eu$  tube-in-tube nanostructures.

| Eu <sup>3+</sup> concentrations (mol%) | Color coordinates (x,y) |
|----------------------------------------|-------------------------|
| 10                                     | (0.6403,0.3593)         |
| 20                                     | (0.6443,0.3554)         |
| 30                                     | (0.6459,0.3554)         |
| 40                                     | (0.6338,0.3658)         |

**Table S2** Color coordinates of  $Y_2(Zr_{0.6}Ti_{0.4})_2O_7$ : x mol%  $Eu^{3+}$  (x = 10, 20, 30, 40) tube-in-tube nanostructures.

| Temperature (K) | Color coordinates (x, y)                                                                              |                                                                                   |
|-----------------|-------------------------------------------------------------------------------------------------------|-----------------------------------------------------------------------------------|
|                 | $\text{Y}_2(\text{Zr}_{0.6}\text{Ti}_{0.4})_2\text{O}_7:30\%$<br>Eu<br>tube-in-tube<br>nanostructures | $\text{Y}_2(\text{Zr}_{0.6}\text{Ti}_{0.4})_2\text{O}_7:30\%$<br>Eu nanoparticles |
| 303             | (0.6429, 0.3567)                                                                                      | (0.6392, 0.3588)                                                                  |
| 333             | (0.6412, 0.3584)                                                                                      | (0.6342, 0.3633)                                                                  |
| 363             | (0.6394, 0.3602)                                                                                      | (0.6290, 0.3680)                                                                  |
| 393             | (0.6378, 0.3618)                                                                                      | (0.6225, 0.3740)                                                                  |
| 423             | (0.6357, 0.3640)                                                                                      | (0.6150, 0.3809)                                                                  |
| 453             | (0.6340, 0.3656)                                                                                      | (0.6055, 0.3895)                                                                  |
| 483             | (0.6320, 0.3676)                                                                                      | (0.5930, 0.4009)                                                                  |
| 513             | (0.6299, 0.3697)                                                                                      | (0.5767, 0.4158)                                                                  |
| 543             | (0.6292, 0.3704)                                                                                      | (0.5591, 0.4318)                                                                  |
| 573             | (0.6275, 0.3721)                                                                                      | (0.5426, 0.4468)                                                                  |
| 603             | (0.6265, 0.3730)                                                                                      | (0.5292, 0.4591)                                                                  |
| 633             | (0.6251, 0.3745)                                                                                      | (0.5211, 0.4667)                                                                  |

**Table S3** Color coordinates of  $\text{Y}_2(\text{Zr}_{0.6}\text{Ti}_{0.4})_2\text{O}_7: 30 \text{ mol\%}$  Eu tube-in-tube nanostructures and  $\text{Y}_2(\text{Zr}_{0.6}\text{Ti}_{0.4})_2\text{O}_7:30\%$ Eu with 0D nanoparticles at different temperatures.
